# Supplementary material for: Effect of the oxygen vacancy electronic state on Ni migration in Li0.5(Ni0.8Mn0.1Co0.1)O2 cathode material
Source: Royal Society of Chemistry journal article supplement (doi:10.1039/d3cp03396a), 2023-01-01
Supplement: d3cp03396a1.pdf [file d3cp03396a1.pdf]

Supporting Information

Effect of oxygen vacancy electronic state on Ni  
migration in  $\text{Li}_{0.5}(\text{Ni}_{0.8}\text{Mn}_{0.1}\text{Co}_{0.1})\text{O}_2$  cathode  
material: a first-principles study

*Ravanny W. M. Komalig<sup>a</sup>, Ganes Shukri<sup>a,b,\*</sup>, Mohammad Kemal Agusta<sup>a,b</sup>, Muhammad Haris  
Mahyuddin<sup>a,b</sup>, Afriyanti Sumboja<sup>c</sup>, Adhitya Gandaryus Saputro<sup>a,b</sup>, Ryo Maezono<sup>d</sup>, Ahmad  
Nuruddin<sup>a,b</sup>, Hermawan Kresno Dipojono<sup>a,b</sup>*

<sup>a</sup>Advanced Functional Materials Research Group, Faculty of Industrial Technology, Institut  
Teknologi Bandung, Bandung 40132, West Java, Indonesia

<sup>b</sup>Research Center for Nanoscience and Nanotechnology, Institut Teknologi Bandung, Bandung  
40132, West Java, Indonesia

<sup>c</sup>Materials Science and Engineering Research Group, Faculty of Mechanical and Aerospace  
Engineering, Institut Teknologi Bandung, Bandung 40132, West Java, Indonesia

<sup>d</sup>School of Information Science, Japan Advanced Institute of Science and Technology (JAIST),  
Asahidai 1-1, Nomi, Ishikawa 923-1292, Japan

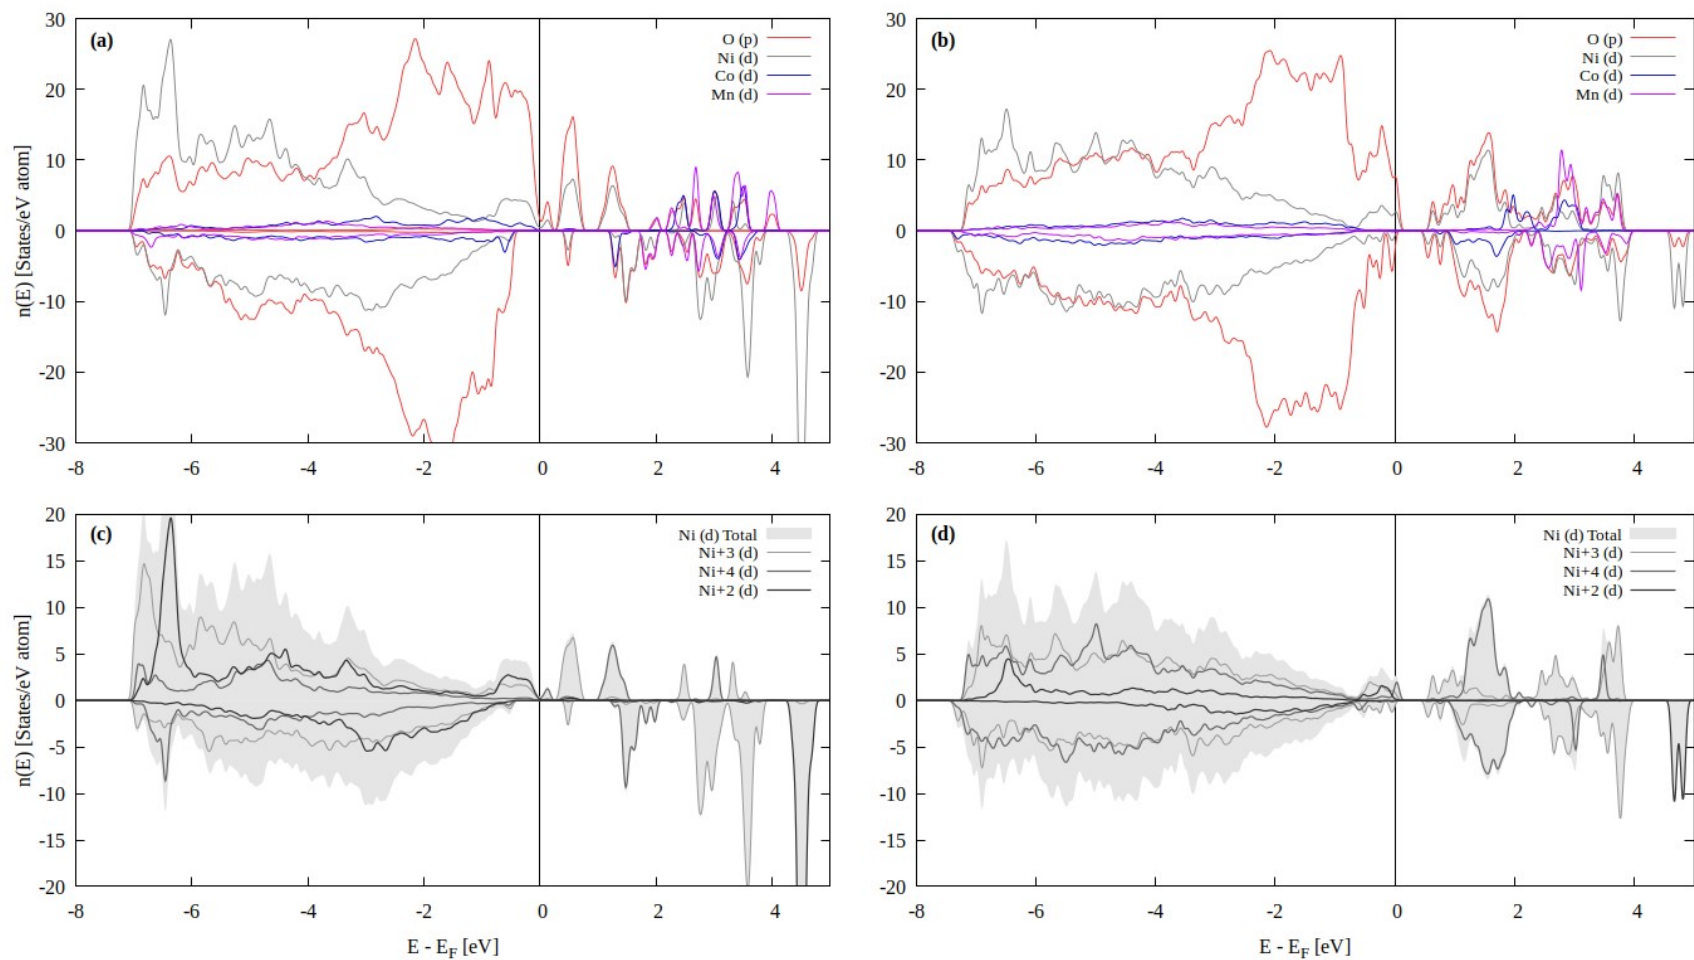

**Figure S1.** (a) and (b), band-decomposed density of states profile of all atoms at 100% and 50% lithation respectively. (c) and (d) density of states of all Ni(*d*) decomposed to each oxidation state (+2, +3 and +4) at 100% and 50% lithation respectively.

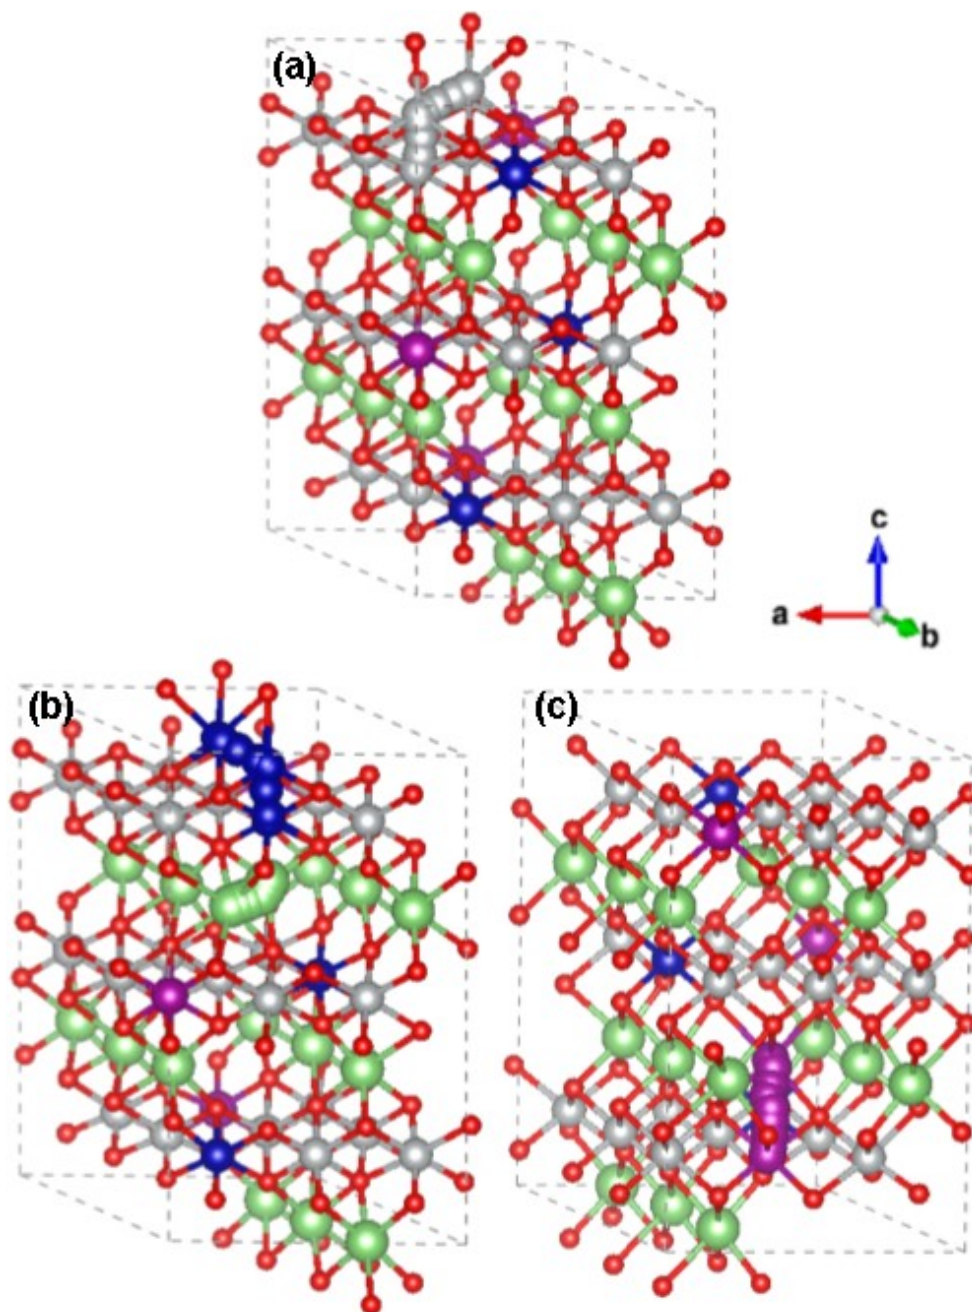

**Figure S2.** Minimum energy path of (a) Ni, (b) Co and (c) Mn calculated using CI-NEB. 3 images were employed for both Ni( $O_{h, TM} \rightarrow T_d$ ) and Ni( $T_d \rightarrow O_{h, Li}$ ). 5 images were employed for Co( $O_{h, TM} \rightarrow T_d$ ) to account simultaneous Li diffusion to  $T_{h, Li}$  and 3 images were employed for Co( $T_d \rightarrow O_{h, Li}$ ). 7 images were employed for direct Mn( $O_{h, TM} \rightarrow O_{h, Li}$ ) because  $T_d$  sites are found to be unstable for Mn to occupy.

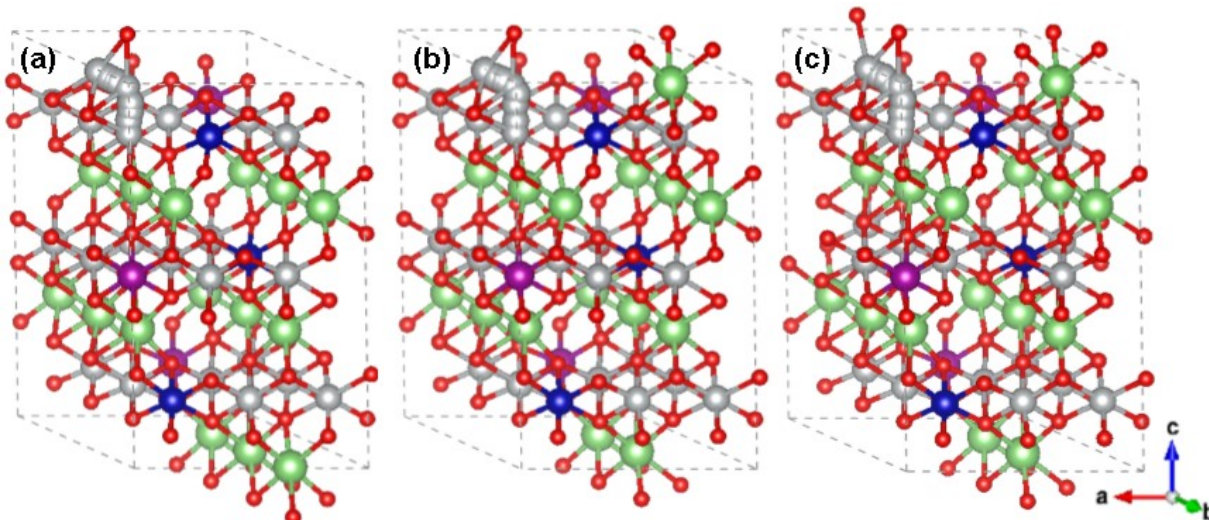

**Figure S3.** Minimum energy path of Ni diffusion next to a vacancy in shared plane of diffusion (O1) at **(a)** neutral, **(b)** (+1)- and **(c)** (+2)-charge states calculated using CI-NEB. 3 images were employed for both  $\text{Ni}(O_{h, TM} \rightarrow T_d)$  and  $\text{Ni}(T_d \rightarrow O_{h, Li})$  at all charge states.

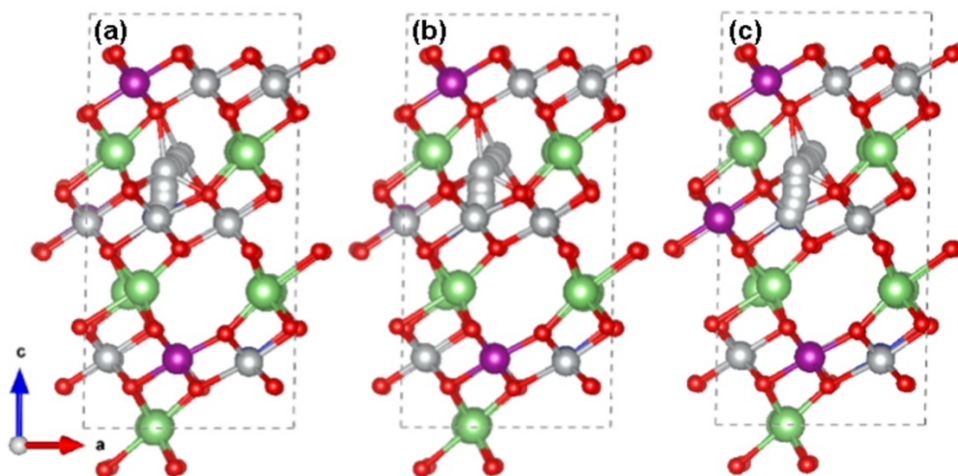

**Figure S4.** Minimum energy path of Ni diffusion next to a vacancy opposing the plane of diffusion (O2) at **(a)** neutral, **(b)** (+1)- and **(c)** (+2)-charge states calculated using CI-NEB. 3 images were employed for both  $\text{Ni}(O_{h, TM} \rightarrow T_d)$  and  $\text{Ni}(T_d \rightarrow O_{h, Li})$  at all charge states.

| Configuration | DFT+ <i>U</i> (eV) |        | DFT+ <i>U</i> +D3 (eV) |        |
|---------------|--------------------|--------|------------------------|--------|
|               | O1                 | O2     | O1                     | O2     |
| FS1           | -0,527             | -0,841 | -0,334                 | -0,439 |
| FS2           | -0,019             | -0,192 | -0,490                 | -0,347 |

**Table S1.** Calculated Ni migration energy in neutral  $O_{vac}$ -contained  $Li_{0.5}NMC811$  without and with dispersion correction. The ‘O1’ and ‘O2’ notation refer to the location of  $O_{vac}$  with respect the normal plane of the dislocated Ni (see **Figure 5** of the main manuscript). The values and notation of FS refers to the “Final State” (of DFT+*U* results) as tabulated in the **Figure 6** in the main manuscript.
